# Supplementary material for: The Red Cell Distribution Width Ratio is Positively Associated with Non-Alcoholic Fatty Liver Disease: A Cross-Sectional Study Using NHANES Data
Source: Research Square preprint supplement (doi:10.21203/rs.3.rs-6464546/v1), 2025-06-04
Supplement: Supplementary file 1 [file 6bc312d9dc338a0037608cf1.docx]

Supplementary Material

## Supplementary Tables

| **Table S1. Univariate logistic regression analysis of the association between HRR exposure and non-alcoholic fatty liver disease after PSM** | | | | | | |
| --- | --- | --- | --- | --- | --- | --- |
|  |  | Model 1 |  |  | Model 2 |  |
| Characteristic | OR | 95% CI | P-value | OR | 95% CI | P-value |
| HRR |  |  |  |  |  |  |
| HRR continuous | 1.25 | (1.147, 1.365) | P < 0.001 | 1.249 | (1.138, 1.372) | P < 0.001 |
| HRR quantile |  |  |  |  |  |  |
| Q1(low) | Ref | Ref |  | Ref | Ref |  |
| Q2 | 1.689 | (1.154, 2.495) | 0.0076 | 1.691 | (1.146, 2.521) | 0.0088 |
| Q3 | 1.356 | (0.912, 2.028) | 0.1341 | 1.302 | (0.862, 1.98) | 0.2118 |
| Q4(high) | 2.372 | (1.654, 3.45) | P < 0.001 | 2.288 | (1.559, 3.402) | P < 0.001 |
| p for trend |  |  | P < 0.001 |  |  | 3e-04 |
| OR, odds ratio; CI, confidence interval; HRR, Hemoglobin-to-red blood cell distribution width ratio | | | | | | |
| Q1, HRR<9.79; Q2, 9.79≤HRR<10.76; Q3, 10.76≤HRR<11.7; Q4, HRR≥11.7 | | | | | | |
| Model 1 was the crude model  Model 2 was adjusted by age, race, and smoking status  Model 3 was adjusted by age, race, smoking status, hypertension diagnosis, and diabetes diagnosis | | | | | | |

| **Table S2. The relationship between HRR and the prevalence of NAFLD further excluding patients with chronic diseases from the controls** | | | | | | |
| --- | --- | --- | --- | --- | --- | --- |
|  |  | Model 1 |  |  | Model 2 |  |
| Characteristic | OR | 95% CI | P-value | OR | 95% CI | P-value |
| HRR |  |  |  |  |  |  |
| HRR continuous | 1.25 | (1.147, 1.365) | P < 0.001 | 1.283 | (1.168, 1.411) | P < 0.001 |
| HRR quantile |  |  |  |  |  |  |
| Q1(low) | Ref | Ref |  | Ref | Ref |  |
| Q2 | 1.689 | (1.154, 2.495) | 0.0076 | 1.769 | (1.194, 2.644) | 0.0048 |
| Q3 | 1.356 | (0.912, 2.028) | 0.1341 | 1.41 | (0.929, 2.152) | 0.108 |
| Q4(high) | 2.372 | (1.654, 3.45) | P < 0.001 | 2.558 | (1.732, 3.826) | P < 0.001 |
| p for trend |  |  | P < 0.001 |  |  | P < 0.001 |
| Model 1 was unadjusted | | | | | | |
| Model 2 was adjusted for age, race, smoking status, hypertension diagnosis, and diabetes diagnosis | | | | | | |
| HRR, Hemoglobin-to-red blood cell distribution width ratio; PSM, Propensity score matching | | | | | | |
